# Supplementary material
Source: PubMed Central journal article supplement (PMC7968043)
Supplement: NIHMS1675304-supplement-Materials_List.pdf [file NIHMS1675304-supplement-Materials_List.pdf]

Materials List for

# Measurement of 3-Dimensional cAMP Distributions in Living Cells using 4-Dimensional (x, y, z, and $\lambda$ ) Hyperspectral FRET Imaging and Analysis

Naga S. Annamdevula<sup>1,2</sup>, Rachel Sweat<sup>3</sup>, Hayden Gunn<sup>1</sup>, John R. Griswold<sup>3</sup>, Andrea L. Britain<sup>1,2</sup>, Thomas C. Rich<sup>1,2</sup>, Silas J. Leavesley<sup>1,2,3</sup>

<sup>1</sup>Department of Pharmacology, University of South Alabama <sup>2</sup>Center for Lung Biology, University of South Alabama <sup>3</sup>Department of Chemical and Biomolecular Engineering, University of South Alabama

## Corresponding Author

Silas J. Leavesley  
leavesley@southalabama.edu

## Citation

Annamdevula, N.S., Sweat, R., Gunn, H., Griswold, J.R., Britain, A.L., Rich, T.C., Leavesley, S.J. Measurement of 3-Dimensional cAMP Distributions in Living Cells using 4-Dimensional (x, y, z, and  $\lambda$ ) Hyperspectral FRET Imaging and Analysis. *J. Vis. Exp.* (), e61720, doi:10.3791/61720 (2020).

## Date Published

October 27, 2020

## DOI

10.3791/61720

## URL

jove.com/video/61720

## Materials

| Name                                  | Company                                    | Catalog Number | Comments                                                                                                                                                                                 |
|---------------------------------------|--------------------------------------------|----------------|------------------------------------------------------------------------------------------------------------------------------------------------------------------------------------------|
| Attofluor Cell Chamber                | Invitrogen                                 | A7816          | Attofluor contains steel cell chambers and a rubber O-ring. Cell chamber holds the coverslip and O-ring provides a lock in mechanism to hold the buffer in cell chamber with out leakage |
| Dimethyl Sulfoxide (DMSO)             | Fisher Scientific                          | BP231-100      | Solvent used to prepare stock solution forskolin.                                                                                                                                        |
| DRAQ5 Fluorescent Probe Solution      | Thermo Scientific                          | 62252          | Nuclear label                                                                                                                                                                            |
| Dulbecco Modified Eagle Medium (DMEM) | Gibco                                      | 11965-092      | Contains nutrients and growth factors for the cells to grow and divide in the culture dishes.                                                                                            |
| Fetal Bovine Serum (FBS)              | Sigma                                      | F6178          | Growth factor suppliment that is added to culture medium, DMEM                                                                                                                           |
| Forskolin                             | Sigma                                      | F3917          | Adenyly cyclase activator.                                                                                                                                                               |
| H188 Cyclic AMP FRET biosensor        | Netherland Cancer Institute, Dr. K. Jalink | Gift           | Plasmid encoding Turquoise (donor fluorophore), Venus (acceptor fluorophore), and binding domain obtained from Epac.                                                                     |
| Image J                               | image.net                                  | Free download  | Another image processing platform used to extract spectral information and image processing.                                                                                             |
| Integrating Sphere                    | Ocean Optics                               | FOIS-1         | Used to measure illumination intensity of the laser line at different laser intensities (?).                                                                                             |
| Laminin Mouse Protein, Natural        | Invitrogen                                 | 23017-015      | Coverslips are coated with laminin and this helps in cell attachment, growth and motility of the cell.                                                                                   |

|                                                    |                                                           |                                                    |                                                                                                                                                           |
|----------------------------------------------------|-----------------------------------------------------------|----------------------------------------------------|-----------------------------------------------------------------------------------------------------------------------------------------------------------|
| Lipofectamine 3000 Transfection Kit                | Invitrogen                                                | L3000-015                                          | Transfection reagent used to transfect cells with H188 FRET biosensor                                                                                     |
| MATLAB                                             | Mathworks                                                 | R2019a                                             | Image processing operations (linear unmixing and FRET efficiency calculations) are performed by writing custom programs in MATLAB programming environment |
| Nikon A1R confocal microscope                      | Nikon Instruments                                         | Nikon A1R                                          | Spectral image acquisition is performed using confocal microscope.                                                                                        |
| Nikon Elements Software                            | Nikon Instruments                                         | Software dongle                                    | used to export and handle nd2 image files (multidimensional image files) that are acquired using Nikon A1R                                                |
| NIST-Traceable Calibration Lamp                    | Ocean Optics                                              | LS-1-CAL-INT                                       | A lamp with a known spectrum for use as a standard                                                                                                        |
| PBS pH 7.4 (1X)                                    | Gibco                                                     | 10010-023                                          | commonly used buffer during cell culture                                                                                                                  |
| Pulmonary Microvascular Endothelial Cells (PMVECs) | In house - Cell culture core, University of South Alabama | Isolated from Rat pulmonary microvasculature       | PMVECs form inner lining of a blood vessel.                                                                                                               |
| Penicillin-Streptomycin (10,000 U/ml)              | Gibco                                                     | 15140-122                                          | antibiotics are added to culture medium to prevent contamination of the cells.                                                                            |
| Pre-Cleaned Gold Seal Micro Slides                 | Clay Adams                                                | 3010                                               | Microscope slides used for cell fixation                                                                                                                  |
| ProLong Diamond Antifade Mounting Media            | Invitrogen                                                | P36961                                             | If samples are fixed using antifade mountant, then the later protects fluorescent dyes and chromophores from fading.                                      |
| Spectrometer                                       | Ocean Optics                                              | QE65000                                            | Used to measure spectral response of the light source (?)                                                                                                 |
| Trypsin-EDTA (0.25%)                               | Gibco                                                     | 25200-056                                          | Digests the protein-protein bond between the cell and cell matrix and helps to dissociate and lift the cells during cell plating.                         |
| Tyrodes Buffer                                     | Made in-house                                             | Made in-house                                      | Tyrodes buffer is used to make working solutions and to maintain cells in aqueous solution during image acquisition.                                      |
| 6 Well Cell Culture Plate                          | Corning                                                   | 3506                                               | Laminin coated coverslips are placed in 6-well culture dish (one coverslips/well). Cells along with medium is added into each well.                       |
| 25 mm Round Microscope Cover Slips                 | Fisher Scientific                                         | 12545102                                           | Cells were grown on round glass coverslips                                                                                                                |
| 60X Objective                                      | Nikon Instruments                                         | Plan Apo VC 60X/1.2 Wl $\infty$ /0.15-0.18 WD 0.27 | water immersion and commonly used objective for cells                                                                                                     |
